# Supplementary material for: Experimental design for metal extraction from facial cosmetics samples and determination by square wave voltammetry
Source: Royal Society of Chemistry journal article supplement (doi:10.1039/c8ay01696h), 2018-01-01
Supplement: c8ay01696h1.pdf [file c8ay01696h1.pdf]

1 **Supplementary material**

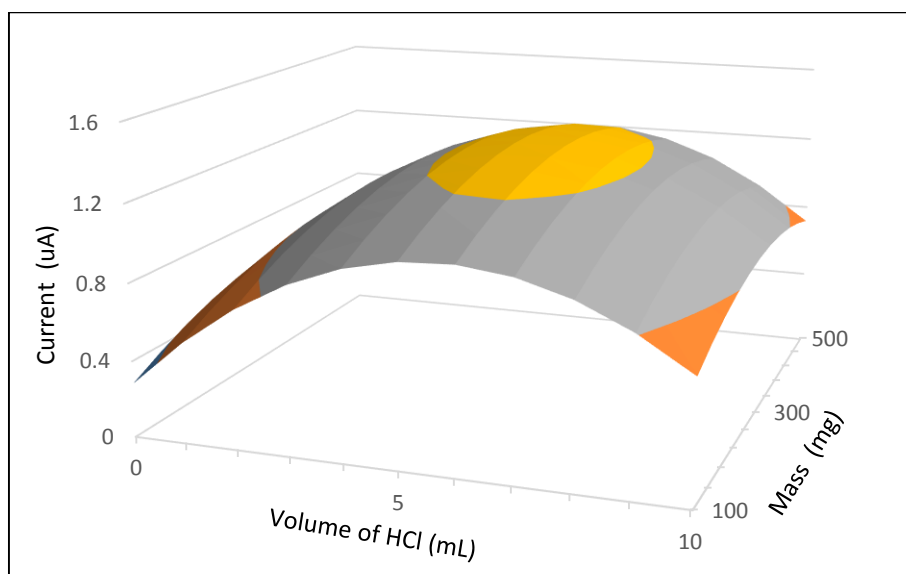

2

3

Figure 1S. Surface response to extraction of Pb in eye shadow sample using heating plate.

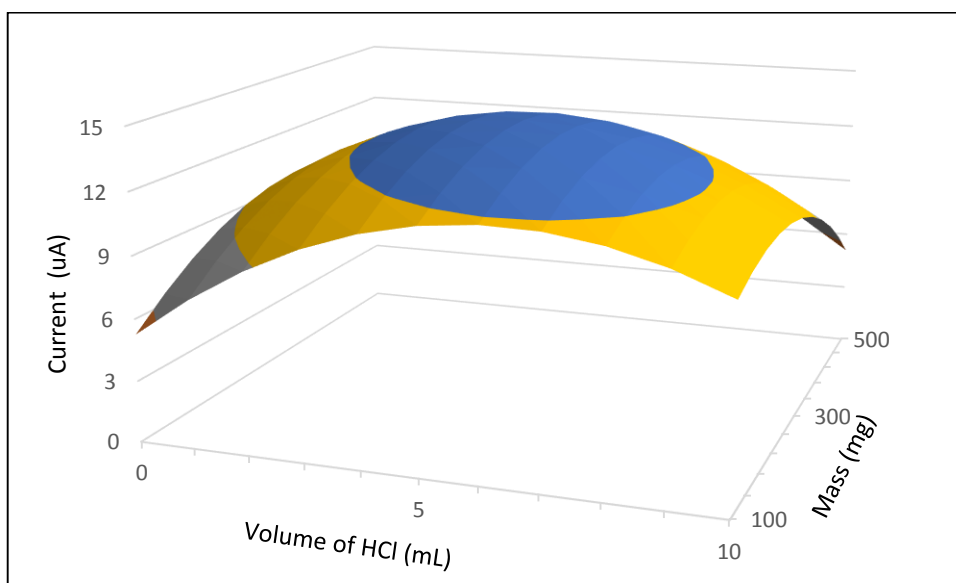

4

5

Figure 2S. Surface response to extraction of Zn in the sample of compact powder using microwave oven.

6

7

8

9

10

11

12

13

Tabela 1S. Program used for sample digestion in a microwave oven

| Program used     |                    |                 |            |           |
|------------------|--------------------|-----------------|------------|-----------|
| Temperature (°C) | Pressure máx (bar) | Ramp time (min) | Time (min) | Power (%) |
| 170              | 35                 | 2               | 5          | 80        |
| 200              | 35                 | 3               | 30         | 90        |
| 50               | 25                 | 1               | 10         | 0         |

14

15

16

17

18

19

20

21

Table 2S. F values (ANOVA) calculated for all models in both digestion methods.

| Sample         | Analytes | F <sub>1calculated</sub> | F <sub>2calculated</sub> |
|----------------|----------|--------------------------|--------------------------|
| Lipstick       | Cu       | 10.98                    | 0.47                     |
|                | Pb       | 6.54                     | 18.67                    |
|                | Zn       | 9.52                     | 12.48                    |
| Eye Shadow     | Cu       | 6.14                     | 17.69                    |
|                | Pb       | 3.98                     | 8.60                     |
|                | Zn       | 8.27                     | 17.11                    |
| Compact powder | Cu       | 18.42                    | 17.79                    |
|                | Pb       | 18.80                    | 5.43                     |
|                | Zn       | 10.25                    | 17.81                    |

22

F<sub>1calculated</sub>: F values calculated for the models obtained from the extration in the heating plate.

23

F<sub>2calculated</sub>: F values calculated for the models obtained from the extration in the microwave oven.

24

F<sub>critical</sub>: 19.16

25
